# Supplementary material for: Selective Survival of Protective Cultures during High-Pressure Processing by Leveraging Freeze-Drying and Encapsulation
Source: MDPI journal article supplement (doi:10.3390/foods11162465), 2022-08-16
Supplement: s1 [file s1]

## Selective survival of protective cultures during high-pressure processing by leveraging freeze-drying and encapsulation.

Meghan R. McGillin\*, Dana L. deRiancho, Timothy A. DeMarsh, Ella D. Hsu, Samuel D. Alcaine\*

Department of Food Science, Cornell University, Ithaca NY 14850

\* Correspondence: mrm392@cornell.edu; M.M.; [alcaine@cornell.edu](mailto:alcaine@cornell.edu); S.A.

| SKIM MILK SAMPLE | SPECIES                       | ACCESSION NO.            |
|------------------|-------------------------------|--------------------------|
| IC-SM/4          | <i>Bacillus thuringiensis</i> | <a href="#">CP050183</a> |
| IC-SM/24         | <i>Bacillus thuringiensis</i> | <a href="#">CP050183</a> |
| IC-SM/72         | <i>Bacillus subtilis</i>      | <a href="#">KR967391</a> |
| EN-SM/24         | <i>Bacillus subtilis</i>      | <a href="#">MN512155</a> |
| EN-SM/72         | <i>Bacillus cereus</i>        | <a href="#">OK655836</a> |

**SI Table S1.** Environmental contamination PCR identification. Preliminary fermentation trials had utilized pasteurized skim milk as the immersion medium repeatedly showed high levels of contamination by *Bacillus* spore formers generally known to be native to this substrate. Species identification was achieved by polymerase chain reaction amplification of their 16S ribosomal RNA genes, followed by Sanger sequencing; the resulting sequences were then compared to those in the National Center for Biotechnology Information's Nucleotide Collection database using the Basic Local Alignment Search Tool (BLAST).
